# Supplementary material
Source: PubMed Central journal article supplement (PMC5404517)
Supplement: AAC.02122-16_zac005176140s1.pdf [file AAC.02122-16_zac005176140s1.pdf]

# Supplemental materials

**The two component system ChtRS contributes to chlorhexidine tolerance in *Enterococcus faecium***

Ana M. Guzmán Prieto, Jessica Wijngaarden, Johanna C. Braat, Malbert R.C. Rogers, Eline Majoor, Ellen C. Brouwer, Xinglin Zhang<sup>\*</sup>, Jumamurat R. Bayjanov, Marc J.M. Bonten, Rob J.L. Willems, Willem van Schaik<sup>a#</sup>.

Department of Medical Microbiology, University Medical Center Utrecht, Utrecht, The Netherlands.

Running title: ChtRS regulates chlorhexidine tolerance in *E. faecium*

# Address correspondence to Willem van Schaik, [w.vanschaik@umcutrecht.nl](mailto:w.vanschaik@umcutrecht.nl).

\*Present address: College of Biosystems Engineering and Food Science, Zhejiang University, Hangzhou 310058, China.

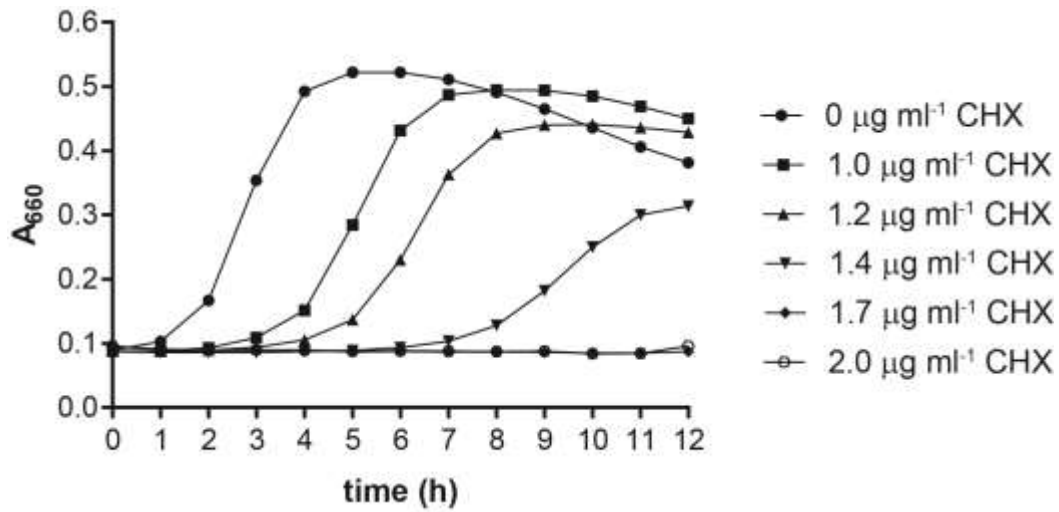

**Fig S1. Growth of *E. faecium* E1162 in different concentrations of CHX.** Growth curves of *E. faecium* E1162 challenged with different concentrations of CHX. The growth curves represent the averages of three replicates.

**Table S1: Strains and plasmids used in this study**

| Strain or plasmid        | Relevant characteristic(s)                                                                           |       | Reference   |
|--------------------------|------------------------------------------------------------------------------------------------------|-------|-------------|
| <b><i>E. faecium</i></b> |                                                                                                      | Clade |             |
| E1162                    | Clinical isolate (blood infection); Amp <sup>r</sup> , Tet <sup>r</sup>                              | A-1   | 61          |
| E980                     | Isolated from feces of a non-hospitalized individual                                                 | B     | 61          |
| E1590                    | Isolated from feces of a non-hospitalized individual                                                 | B     | 3           |
| E7345                    | Clinical isolate (bloodstream infection) Aus0004; Van <sup>r</sup>                                   | A-1   | 60          |
| E745                     | Clinical isolate (bloodstream infection) ; Van <sup>r</sup>                                          | A-1   | unpublished |
| E1007                    | Isolate from feces of a non-hospitalized individual, identical to strain EnGen0015                   | B     | 61          |
| E1679                    | Hospital outbreak (catheter tip)                                                                     | A-2   | 61          |
| E1636                    | Clinical isolate (bloodstream infection)                                                             | A-2   | 61          |
| $\Delta chtS$            | Markerless deletion mutant of <i>chtS</i> in E1162                                                   |       | This study  |
| $\Delta chtR$            | Markerless deletion mutant of <i>chtR</i> in E1162                                                   |       | This study  |
| $\Delta chtS+chtS$       | <i>In trans</i> complementation strain of $\Delta chtS$ , $\Delta chtS$ harboring pEF25- <i>chtS</i> |       | This study  |
| $\Delta chtR+chtR$       | <i>In trans</i> complementation strain of $\Delta chtR$ , $\Delta chtR$ harboring pEF25- <i>chtR</i> |       | This study  |
| $\Delta chtS+pEF25$      | Markerless deletion mutant of <i>chtS</i> in E1162 carrying empty pEF25                              |       | This study  |
| $\Delta chtR+pEF25$      | Markerless deletion mutant of <i>chtP</i> in E1162 carrying empty pEF25                              |       | This study  |
| <b><i>E. coli</i></b>    |                                                                                                      |       |             |
| Ec1000                   | MC1000 <i>glgB::repA</i>                                                                             |       | 62          |
| <b>Plasmids</b>          |                                                                                                      |       |             |
| pWS3                     | Gram-positive thermosensitive origin; Spc <sup>r</sup>                                               |       | 41          |
| pWJ1                     | pWS3 derivative containing fused 5' and 3' flanking regions of <i>chtS</i>                           |       | This study  |
| pWJ2                     | pWS3 derivative containing fused 5' and 3' flanking regions of <i>chtR</i>                           |       | This study  |
| pWS3-Cre                 | Derivative of pWS3 expressing <i>cre</i> recombinase in <i>E. faecium</i>                            |       | 31          |
| pEF25                    | pAT18 derivative carrying spectinomycin cassette                                                     |       | 63          |
| pEF25- <i>chtS</i>       | Plasmid for the complementation of $\Delta chtS$ , pEF25 carrying <i>chtS</i>                        |       | This study  |
| pEF25- <i>chtR</i>       | Plasmid for the complementation of $\Delta chtR$ , pEF25 carrying <i>chtR</i>                        |       | This study  |

Amp: ampicillin; Tet: tetracycline; Van: vancomycin; Spc: spectinomycin.

**Table S2: Oligonucleotides used in this study**

| Primer                     | Sequence                                                                                            |
|----------------------------|-----------------------------------------------------------------------------------------------------|
| Up-chtS_2202-F-XhoI        | CCGCTCGAGGGAAGAAAACGGCTCCCG                                                                         |
| Up-chtS_2202-R- EcoRI      | GCGCAAACATCGAATTCGACGGCTGAATCAACTG                                                                  |
| Down-chtS_2202-F- EcoRI    | CCGTCGAATTCGATGTTGGCGCCAGCCAC                                                                       |
| Down-chtS_2202-R-XmaI      | CCCCCGGGCATTTCCAAATCGATGTACTG                                                                       |
| Up-chtR_2203-F-XhoI        | CCGCTCGAGGAAGCGGAAAGTGGCACTTTG                                                                      |
| Up-chtR_2203-R- EcoRI      | CAATTGATCGAATTC AACATCAATCGGTTACGCCG                                                                |
| Down-chtR_2203-F- EcoRI    | CGATTGATGTTGGAATTCGATCAATTGTCGAATGATCTCTTCG                                                         |
| Down-chtR_2203-R-XmaI      | CCCCCGGGATACATTAGCAATTAGAGAAAAGC                                                                    |
| pAT392_EcoRI_lox66_genta_F | GAGGGAATTC TACCGTTCGATATAGCATA CATTATACGAAGTTATGATA                                                 |
| pAT392_EcoRI_lox71_genta_R | AACCCAGCGAACCATTTGAGG<br>CTCCGAATTC TACCGTTCGATAAATGTATGCTATACGAAGTTATTCAAT<br>CTTTATAAGTCCTTTTATAA |
| Comp2202_Fw_SacI           | CCGGAGCTCTCCAAGCTAAGCCGGATAAA                                                                       |
| Comp2202_Rv_SmaI           | TTGCCCGGG AATGCATTACTTCGCCGTTT                                                                      |
| Comp2203_Fw_SacI           | CCGGAGCTCTGGACCCATGAGTCAATATAATC                                                                    |
| Comp2203_Rv_SmaI           | TTGCCCGGG ACCGTGAACACTCACCGATT                                                                      |

Restriction sites are underlined.

### Supplemental references

3. **Lebreton F, van Schaik W, Manson McGuire A, Godfrey P, Griggs A, Mazumdar V, Corander J, Cheng L, Saif S, Young S, Zeng Q, Wortman J, Birren B, Willems RJL, Earl AM, Gilmore MS.** 2013. Emergence of Epidemic Multidrug-Resistant *Enterococcus faecium* from Animal and Commensal Strains. *mBio* **4**:e00534-13-e00534-13.
31. **Zhang X, Paganelli FL, Bierschenk D, Kuipers A, Bonten MJM, Willems RJL, van Schaik W.** 2012. Genome-Wide Identification of Ampicillin Resistance Determinants in *Enterococcus faecium*. *PLoS Genet* **8**:e1002804.
40. **Zhang X, Vrijenhoek JEP, Bonten MJM, Willems RJL, van Schaik W.** 2011. A genetic element present on megaplasms allows *Enterococcus faecium* to use raffinose as carbon source. *Environ Microbiol* **13**:518–528.
59. **Lam MMC, Seemann T, Bulach DM, Gladman SL, Chen H, Haring V, Moore RJ, Ballard S, Grayson ML, Johnson PDR, Howden BP, Stinear TP.** 2012. Comparative analysis of the first complete *Enterococcus faecium* genome. *J Bacteriol* **194**:2334–2341.
60. **van Schaik W, Top J, Riley DR, Boekhorst J, Vrijenhoek JE, Schapendonk CM, Hendrickx AP, Nijman IJ, Bonten MJ, Tettelin H, Willems RJ.** 2010. Pyrosequencing-based comparative genome analysis of the nosocomial pathogen *Enterococcus faecium* and identification of a large transferable pathogenicity island. *BMC Genomics* **11**:239.
61. **Leenhouts K, Buist G, Bolhuis A, ten Berge A, Kiel J, Mierau I, Dabrowska M, Venema G, Kok J.** 1996. A general system for generating unlabelled gene replacements in bacterial chromosomes. *Mol Gen Genet* **253**:217–224.

62. **Top J, Paganelli FL, Zhang X, van Schaik W, Leavis HL, van Luit-Asbroek M, van der Poll T, Leendertse M, Bonten MJM, Willems RJJ.** 2013. The *Enterococcus faecium* enterococcal biofilm regulator, EbrB, regulates the *esp* operon and is implicated in biofilm formation and intestinal colonization. PLOS One **8**:e65224.
